# Supplementary material
Source: publisher figshare collection journal article supplement (https://sage.figshare.com/ndownloader/files/38006373)
Supplement: Supplementary file 1 [file 38006373]

**Online Appendix B – MILINDA**

Please cite as:

Jetschke, Anja, and Bernd Schlipphak (forthcoming) The Military and Non-Military Interventions Dataset: A new dataset on United-Nations-led and Non-United-Nations-led peace operations.’ In: *Conflict Management and Peace Science*.

Table B1: Distribution of Intervention Categories over Time

|  | **Before 1992 (in %)** | **From 1992 onwards (in %)** | ∑ |
| --- | --- | --- | --- |
| **Peace Enforcement** | 2 (2.2) | 3 (1.5) | *5* |
| **Peacekeeping** | 42 (46.7) | 83 (40.9) | *125* |
| **Observer** | 40 (44.4) | 47 (23.2) | *87* |
| **Other** | 6 (6.7) | 70 (34.5) | *76* |
| ∑ | *90* | *203* | ***293*** |

Table B2: Distribution of Intervention Categories across Regions (from 1992 onward)

|  | *Region* | | | | | | | | |
| --- | --- | --- | --- | --- | --- | --- | --- | --- | --- |
|  | **CSA** | **EUR** | **EURA** | **LAC** | **MENA** | **PAC** | **SEA** | **SSA** | ∑ |
| **Peace Enforcement** | 0 | 1 | 0 | 0 | 1 | 0 | 0 | 1 | *3* |
| **Peacekeeping** | 2 | 17 | 3 | 6 | 4 | 2 | 4 | 45 | *83* |
| **Observer** | 1 | 4 | 5 | 5 | 4 | 5 | 5 | 18 | *47* |
| **Other** | 3 | 22 | 6 | 2 | 5 | 4 | 4 | 24 | *70* |
| ∑ | *6* | *44* | *14* | *13* | *14* | *11* | *13* | *88* | ***203*** |
